# Supplementary material
Source: publisher figshare collection journal article supplement (https://acs.figshare.com/ndownloader/files/4618879)
Supplement: Supplementary file 1 [file 4618879]

## Supplementary Data

### Source Apportionment of PAH in Hamilton Harbour Suspended Sediments: Comparison of Two Factor Analysis Methods

U. Sofowote, B. McCarry\*, C. Marvin

#### List of Tables

Table S1: SPAH values, sample names, sampling dates and seasons for Hamilton Harbour suspended sediments and creek samples. Identification (ID) numbers are used in Figure 2

Page S3

Table S2: Mean Recoveries and Standard Deviations of Deuterated PAH Recovery Standards

Page S5

Table S3: Comparison of percentage contributions of factors identified by PCA and PMF

Page S9

Table S4: PAH concentration ( $\mu\text{g/g}$  dry sediment extracted) and uncertainty data matrices for Hamilton Harbour suspended sediments

Page S11

Table S5: PMF diagnostics file for Hamilton Harbour suspended sediments

Page S14

#### List of Figures

Figure S1: Principal component scores regression plot for Hamilton Harbour suspended sediments and creek sediments.

Page S4

Figure S2: Positive Matrix Factorization Factor Contributions Regression Plot

Page S4

Figure S3: Plot of PMF Predicted Average vs. Measured PAH Average for each PAH

Page S5

Figure S4: PMF explained variation plots for 25 compounds in the four PMF factors identified in the Hamilton Harbour data set (order of compounds same as in Table 3)

Page S5

Figure S5: Comparison of the PAH profiles of (a) factor 3 (Gasoline Emissions) with SRM 1649a (NIST Urban Dust Reference Material) profile; (b) factor 4 (Coal Tar/Combustion with SRM 1597a (NIST Coal Tar Reference Material)

Page S6

Figure S6: PAH loadings profile of unidentified factor  $f_2$  tentatively attributed to a weathered PAH profile

Page S6

Figure S7: Plot of two diagnostic PAH ratios ( $BaA/\Sigma 228$  against  $IP/IP+BghiP$ ) for the Hamilton Harbour and creek suspended sediments. Six source sample ratios and zones related to source types as described are included by Yunker et al. (5). Numbers refer to sediment samples in Table S1

Page S7

Figure S8: PCA-MLR source contributions plot for Hamilton Harbour suspended sediments and creek sediments ( $\mu g/g$ )

Page S16

Figure S9: Contributions of four PMF factors (in  $\mu g/g$ ) to the SumPAH ( $\mu g/g$ ) of each suspended sediment sample collected in Hamilton Harbour and the creeks

Page S17

Principal Component Analysis of Hamilton Harbour Data

Page S18

Table S1: SumPAH values, sample names, sampling dates and seasons for Hamilton Harbour suspended sediments and creek samples. Identification (ID) numbers are used in Figure 2.

| ID | Sampling Station Name | Date   | Season | SumPAH (µg/g) |
|----|-----------------------|--------|--------|---------------|
| 1  | Spencer Creek         | Nov-06 | Fall   | 2.4           |
| 2  | Indian Creek          | Nov-06 | Fall   | 1.8           |
| 3  | Borer's Creek         | Nov-06 | Fall   | 0.7           |
| 4  | Desjardin Canal       | Nov-06 | Fall   | 3.0           |
| 5  | Grindstone Creek      | Nov-06 | Fall   | 1.6           |
| 6  | Chedoke Creek         | Nov-06 | Fall   | 20.6          |
| 7  | Red Hill Creek        | Nov-06 | Fall   | 48.5          |
| 8  | 9031                  | Aug-03 | Summer | 13.1          |
| 9  | 9031                  | Dec-04 | Fall   | 13.9          |
| 10 | 9032                  | May-03 | Spring | 14.9          |
| 11 | 9032                  | Nov-03 | Fall   | 25.9          |
| 12 | 9032                  | Jun-04 | Summer | 13.9          |
| 13 | 9081 (Randle Reef A)  | May-05 | Spring | 15.1          |
| 14 | 9081 (Randle Reef A)  | Jun-05 | Summer | 26.9          |
| 15 | 9081 (Randle Reef A)  | Sep-05 | Fall   | 26.8          |
| 16 | 9081 (Randle Reef A)  | Aug-06 | Summer | 17.6          |
| 17 | 9083 (Randle Reef B)  | May-05 | Spring | 36.9          |
| 18 | 9083 (Randle Reef B)  | Jun-05 | Summer | 44.2          |
| 19 | 9083 (Randle Reef B)  | Aug-06 | Summer | 31.1          |
| 20 | 9030                  | Nov-02 | Fall   | 27.0          |
| 21 | 9030                  | Jul-04 | Summer | 6.7           |

|    |                         |        |        |      |
|----|-------------------------|--------|--------|------|
| 22 | 9033                    | Nov-03 | Fall   | 30.4 |
| 23 | 9033                    | Aug-03 | Summer | 32.5 |
| 24 | 9033                    | Dec-04 | Fall   | 30.8 |
| 25 | 914 (Windermere Bridge) | May-03 | Spring | 71.2 |
| 26 | 914 (Windermere Bridge) | Feb-04 | Winter | 73.1 |

Figure S1: Principal component scores regression plot for Hamilton Harbour suspended sediments and creek sediments.

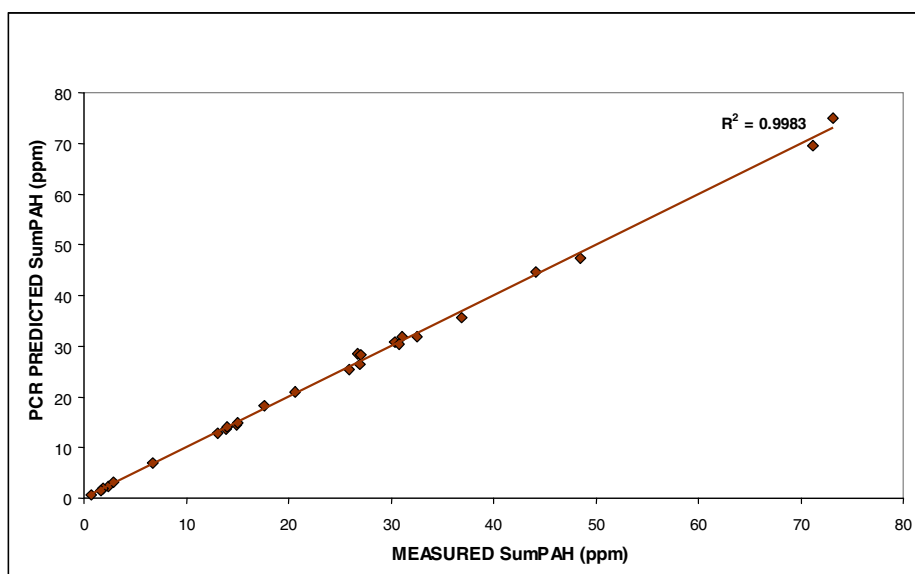

Figure S2: Positive Matrix Factorization Factor Contributions Regression Plot

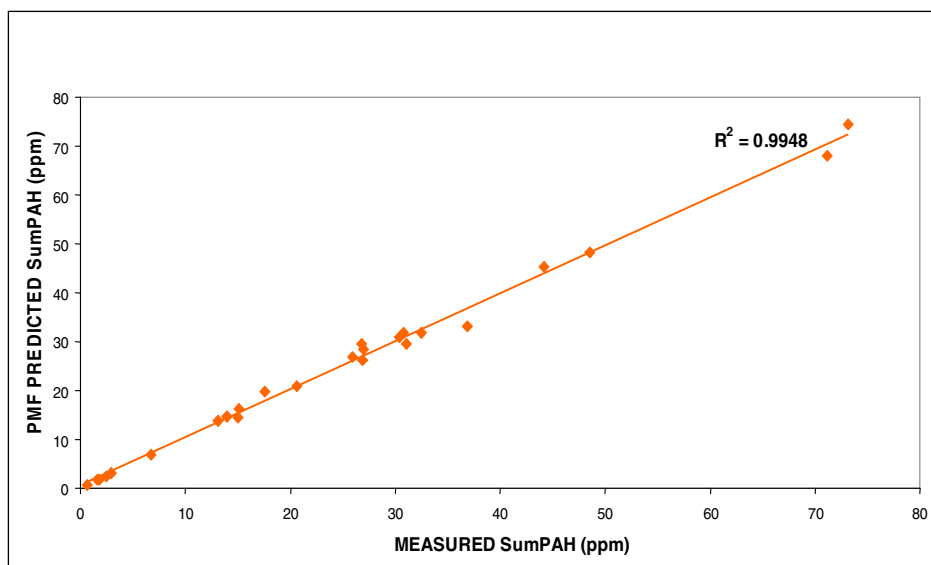

Figure S3: Plot of PMF Predicted Average vs. Measured PAH Average for each PAH

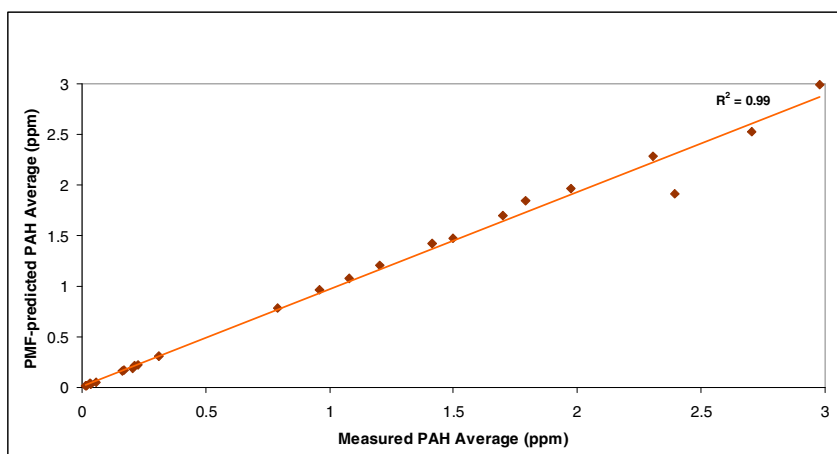

Table S2: Mean Recoveries and Standard Deviations of Deuterated PAH Recovery

|                                       | Mean Recovery (%) | Standard Deviation (%) | Ions Integrated (m/z) |
|---------------------------------------|-------------------|------------------------|-----------------------|
| Phenanthrene-d <sub>10</sub>          | 63.6              | 21.5                   | 188                   |
| Chrysene-d <sub>12</sub>              | 97.7              | 2.2                    | 240                   |
| Dibenz[a,h]anthracene-d <sub>14</sub> | 101               | 1                      | 289, 290, 291, 292    |

Figure S4: PMF explained variation plots for 25 compounds in the four PMF factors identified in the Hamilton Harbour data set (order of compounds same as in Table 3).

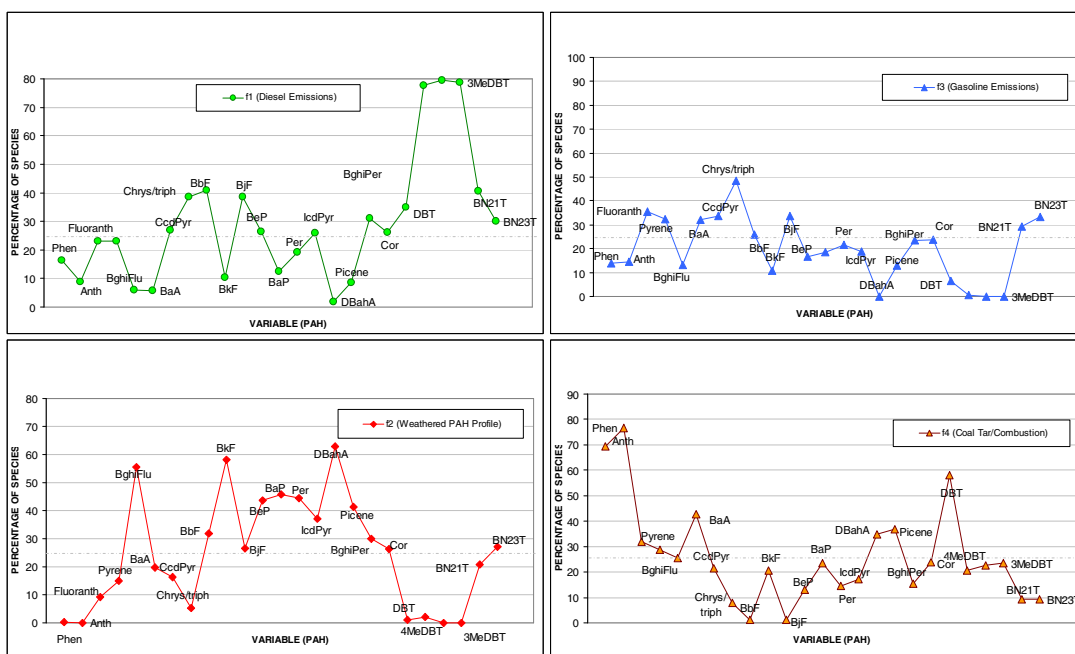

Figure S5: Comparison of the PAH profiles of (a) factor 3 (Gasoline Emissions) with SRM 1649a (NIST Urban Dust Reference Material) profile; (b) factor 4 (Coal Tar/Combustion with SRM 1597a (NIST Coal Tar Reference Material).

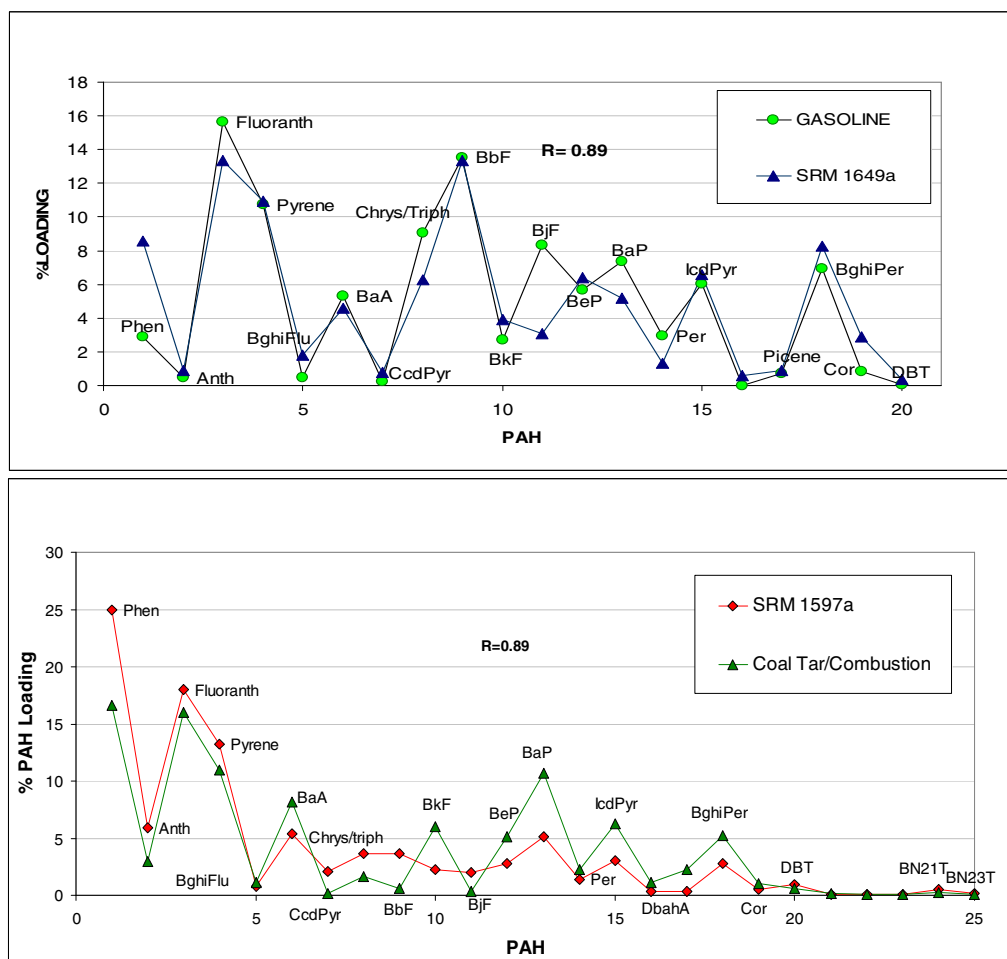

Figure S6: PAH loadings profile of unidentified factor  $f_2$  tentatively attributed to a weathered PAH profile.

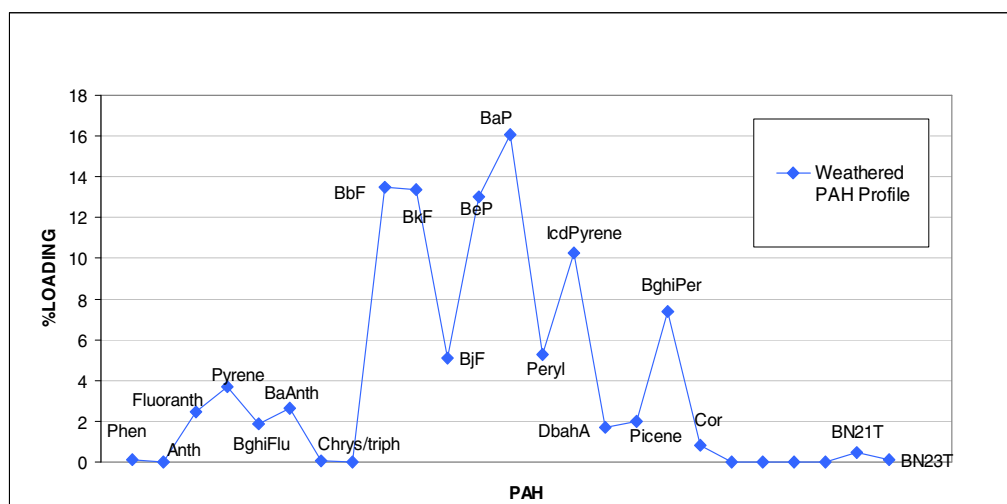

Figure S7: Plot of two diagnostic PAH ratios ( $BaA/\Sigma 228$  against  $IP/IP+BghiP$ ) for the Hamilton Harbour and creek suspended sediments. Six source sample ratios and zones related to source types as described are included by Yunker et al. (5). Numbers refer to sediment samples in Table S1

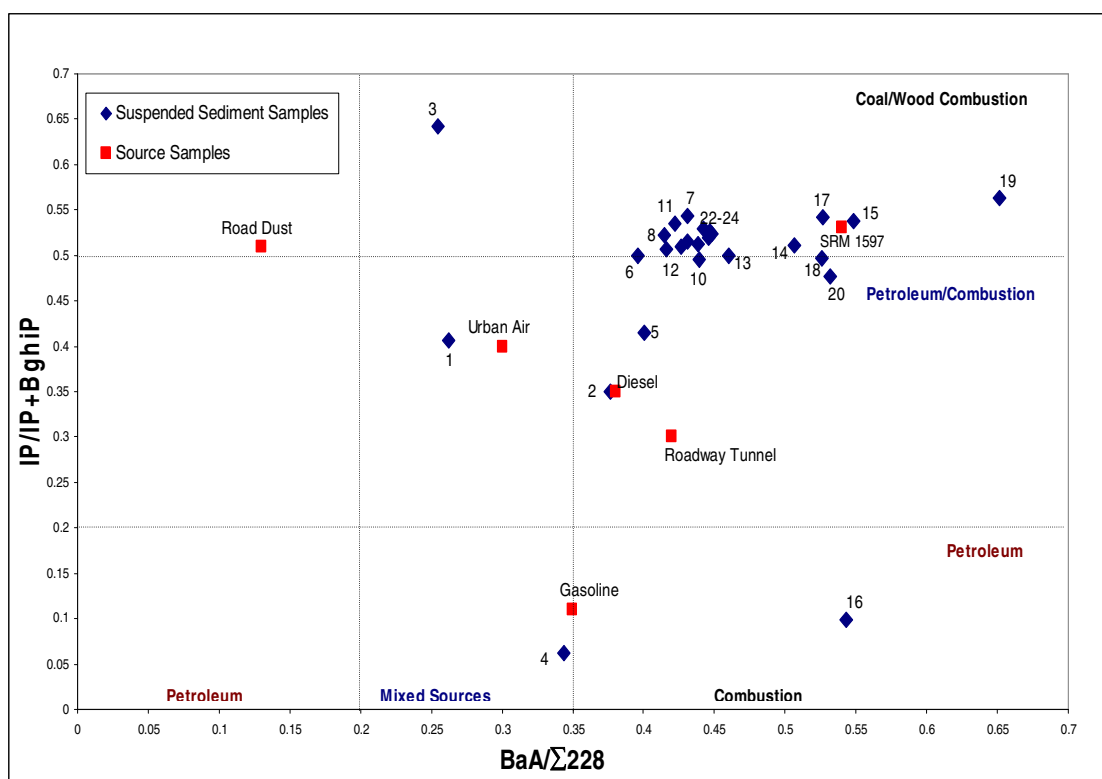

### Explanation for Figure S7

A number of diagnostic PAH ratios (5) were calculated using the suspended sediment sample data. The most useful ratios to discriminate between sources were the  $BaA/\Sigma 228$  and  $IP/IP+BghiP$  ratios. The plot of these data are shown in Figure S6, together with the ratio ranges suggested by Yunker et al. (5) that are indicative of the certain source types; the values for six sources cited by Yunker et al are also included on the figure. The harbour sediment samples are clustered in the upper right hand section of the plot. Five samples are very proximate to the NIST SRM 1597 (Coal Tar) reference material,

indicative of a high correlation to a coal tar source; four of these samples were collected at Randle Reef stations (#14, #15, #17, and #18). The remaining harbour samples (except #16 and #19) are found to the left of the SRM 1597 value and approximately halfway between the coal tar sample and the diesel and urban air samples. With the exception of the Chedoke Creek and Red Hill Creek samples (#6 and #7), the creek samples were located well away from the harbour sediment samples, in some cases proximate to the urban air source sample (#1), the diesel source sample (#4). This diagnostic ratio approach showed that sources of PAH to Hamilton Harbour suspended sediments are split between coal tar or coal combustion sources and a variety of urban-based combustion sources. However, this method was not amenable to determining the relative contributions to each sample from the source types. Thus, while diagnostic PAH ratios approach can be useful in elucidating qualitative relationships, a more quantitative approach was needed for this work. Thus, we turned our attention to receptor modeling techniques employing factor analyses.

Table S3: Comparison of percentage contributions of factors identified by PCA and PMF

| PMF Factor     | PMF Contribution | PCA Factor     | PCA Contribution | Source Identification                   |
|----------------|------------------|----------------|------------------|-----------------------------------------|
| f <sub>2</sub> | 26%              | t <sub>3</sub> | 19%              | Coal Tar/Coal Combustion                |
| f <sub>1</sub> | 28%              | t <sub>1</sub> | 61%              | Gasoline Emissions                      |
| f <sub>4</sub> | 24%              |                |                  | Diesel Emissions<br>Vehicular Emissions |
| f <sub>3</sub> | 22%              |                |                  | Weathered PAH Profile                   |
|                |                  | t <sub>2</sub> | 13%              | Unburned Fossil Fuels                   |
|                |                  | t <sub>4</sub> | 7%               | Unknown PC Source                       |



*Data Pre-treatment for PMF Analysis:* One hundred and thirty one data points of the total 650 points (~20%) in the concentration matrix (see Table S4) were below their method detection limits, thus it was of utmost interest to observe how PMF processed the uncensored data set. The data points below detection limits were not replaced by the mean concentrations for any of the PAH variables or by their method detection limits. Undetected PAH were reported in the concentration matrix as zero. This is critical as no missing values are allowed in the PMF analysis the EPA PMF 1.1 program executes. The concentration matrix contains no negative values, because the PAH concentration values from the extracted method blanks which provided the background concentration were zero. No approximation of concentration values was performed prior to PMF analysis. Nine PAH variables (see Table S5) were weighted as weak due to any of the following reasons; (i) low S/N values; (ii) low  $R^2$ , and; (iii) residuals being greater than  $\pm 3$  standard deviation. Cyclopenta[cd]pyrene had the lowest  $R^2$  of 0.4 and was down-weighted for this reason. This confirmed that the use of this variable as having equal weight as strong variables as executed by the PCA was wrong, invariably leading to a highly suspect component being identified by the PCA. BghiFlu, BaP and IcdPyr were downweighted even though their S/N ratios were good because their residuals had distances greater than  $\pm 3$  standard deviations. A re-run with these three variables weakened showed only IcdPyr having a noisy residual in sample #16 (see Table S5). The robust Q for 7 of 15 runs (all convergent) was 215.62. Random run #3 (robust Q = 215.62) was selected for further processing because it had the lowest true Q (216.74) and was converged in the fewest number of steps.

Table S4: PAH concentration (µg/g dry sediment extracted) and uncertainty data matrices for Hamilton Harbour suspended sediments

| Concentration Matrix              | Phen   | Anth   | Fluoranth | Pyrene | BghiFlu | BaA    | CcdPyr | Chrys/Triph | BbF   | BkF   | BjF   |
|-----------------------------------|--------|--------|-----------|--------|---------|--------|--------|-------------|-------|-------|-------|
| SPENCER                           | 0.125  | 0.019  | 0.343     | 0.297  | 0.030   | 0.066  | 0.001  | 0.185       | 0.278 | 0.139 | 0.120 |
| INDIAN                            | 0.103  | 0.013  | 0.323     | 0.155  | 0.020   | 0.072  | 0.001  | 0.118       | 0.214 | 0.115 | 0.081 |
| BORER'S                           | 0.037  | 0.001  | 0.080     | 0.057  | 0.006   | 0.014  | 0.000  | 0.042       | 0.113 | 0.048 | 0.051 |
| DESJARDIN                         | 0.137  | 0.011  | 0.357     | 0.228  | 0.027   | 0.091  | 0.000  | 0.174       | 0.419 | 0.159 | 0.191 |
| GRINDSTONE                        | 0.083  | 0.005  | 0.193     | 0.231  | 0.014   | 0.058  | 0.000  | 0.087       | 0.177 | 0.113 | 0.105 |
| CHEDOKE                           | 0.761  | 0.134  | 2.461     | 1.977  | 0.206   | 0.741  | 0.007  | 1.132       | 2.697 | 1.380 | 1.240 |
| REDHILL                           | 0.752  | 0.117  | 3.623     | 3.649  | 0.434   | 1.573  | 0.170  | 2.076       | 7.292 | 3.327 | 3.330 |
| STN 9031 AUG 12 2003              | 0.716  | 0.064  | 1.383     | 0.926  | 0.122   | 0.510  | 0.013  | 0.721       | 1.636 | 0.951 | 0.824 |
| STN 9031 DEC 02 2004              | 0.682  | 0.125  | 1.439     | 1.156  | 0.138   | 0.541  | 0.040  | 0.714       | 1.893 | 0.856 | 0.884 |
| STN 9032 MAY 20 2003              | 1.060  | 0.181  | 1.907     | 1.348  | 0.122   | 0.479  | 0.002  | 0.611       | 1.743 | 0.970 | 0.819 |
| STN 52 NOV 27 2003                | 1.656  | 0.237  | 2.462     | 1.499  | 0.245   | 0.892  | 0.038  | 1.106       | 3.762 | 1.560 | 1.641 |
| STN 9032 JUN 16 2004              | 0.822  | 0.151  | 1.263     | 1.120  | 0.122   | 0.508  | 0.011  | 0.713       | 1.785 | 0.832 | 0.809 |
| STN 9081 MAY 17 2005              | 1.126  | 0.166  | 1.656     | 0.910  | 0.126   | 0.735  | 0.024  | 0.863       | 1.721 | 0.854 | 0.864 |
| STN 9081 JUN 21 2005              | 1.999  | 0.198  | 3.487     | 3.785  | 0.195   | 1.264  | 0.030  | 1.232       | 2.583 | 1.333 | 1.431 |
| STN 9081 SEPT 07 05               | 1.917  | 0.376  | 2.991     | 2.162  | 0.188   | 1.560  | 0.028  | 1.285       | 2.712 | 1.485 | 1.486 |
| STN 9081 AUG 12 2006              | 1.412  | 0.201  | 2.141     | 1.454  | 0.186   | 0.971  | 0.021  | 0.818       | 2.314 | 0.979 | 1.091 |
| STN 9083 MAY 2005                 | 2.925  | 0.657  | 6.085     | 6.863  | 0.268   | 1.715  | 0.046  | 1.544       | 2.754 | 1.352 | 1.400 |
| STN 9083 JUN 21 2005              | 2.678  | 0.738  | 5.582     | 6.834  | 0.306   | 2.405  | 0.130  | 2.166       | 4.261 | 1.939 | 2.270 |
| STN 9083 AUG 12 2006              | 2.695  | 0.475  | 4.368     | 3.685  | 0.376   | 1.462  | 0.045  | 0.781       | 2.100 | 2.148 | 0.777 |
| STN 9030 NOV 07 2002              | 1.448  | 0.225  | 2.649     | 1.762  | 0.255   | 1.035  | 0.034  | 0.910       | 3.667 | 2.060 | 1.763 |
| STN 9030 JUL 29 2004              | 0.406  | 0.051  | 0.742     | 0.663  | 0.062   | 0.266  | 0.006  | 0.358       | 0.785 | 0.350 | 0.362 |
| STN 53 NOV 27 2003                | 1.750  | 0.321  | 2.959     | 2.707  | 0.297   | 1.012  | 0.020  | 1.277       | 4.256 | 1.735 | 1.833 |
| STN 9033 AUG 12 2003              | 1.879  | 0.231  | 3.221     | 3.103  | 0.265   | 1.000  | 0.014  | 1.230       | 4.452 | 1.909 | 1.895 |
| STN 9033 DEC 02 2004              | 1.835  | 0.254  | 2.680     | 1.969  | 0.247   | 1.012  | 0.049  | 1.252       | 4.347 | 2.014 | 1.986 |
| WINDERMERE MAY 13 2003            | 1.178  | 0.180  | 8.694     | 8.079  | 0.636   | 2.396  | 0.016  | 3.071       | 9.549 | 4.377 | 4.440 |
| WINDERMERE FEB 19 2004            | 1.113  | 0.170  | 7.181     | 5.640  | 0.962   | 2.598  | 0.081  | 3.561       | 9.903 | 6.006 | 5.074 |
| MEAN CONC                         | 1.204  | 0.204  | 2.703     | 2.395  | 0.225   | 0.961  | 0.032  | 1.078       | 2.978 | 1.500 | 1.414 |
| Equation Based Uncertainty Matrix |        |        |           |        |         |        |        |             |       |       |       |
|                                   | Phen   | Anth   | Fluoranth | Pyrene | BghiFlu | BaA    | CcdPyr | Chrys/Triph | BbF   | BkF   | BjF   |
| MDL (e_j)                         | 0.0196 | 0.0196 | 0.0246    | 0.0246 | 0.0246  | 0.0246 | 0.0246 | 0.0246      | 0.147 | 0.147 | 0.147 |
| d_j (%)                           | 21.5   | 21.5   | 21.5      | 21.5   | 2.2     | 2.2    | 2.2    | 2.2         | 2.2   | 2.2   | 2.2   |

| Concentration Matrix              |       |       |       |        |        |        |         |        |        |        |
|-----------------------------------|-------|-------|-------|--------|--------|--------|---------|--------|--------|--------|
|                                   | BeP   | BaP   | Per   | lcdPyr | DBahA  | Picene | BghiPer | Cor    | DBT    | 4MeDBT |
| SPENCER                           | 0.207 | 0.163 | 0.055 | 0.140  | 0.007  | 0.019  | 0.205   | 0.000  | 0.003  | 0.003  |
| INDIAN                            | 0.111 | 0.115 | 0.155 | 0.065  | 0.016  | 0.016  | 0.121   | 0.000  | 0.004  | 0.002  |
| BORER'S                           | 0.085 | 0.063 | 0.026 | 0.035  | 0.004  | 0.005  | 0.020   | 0.000  | 0.001  | 0.001  |
| DESJARDIN                         | 0.266 | 0.245 | 0.194 | 0.017  | 0.016  | 0.038  | 0.259   | 0.039  | 0.006  | 0.004  |
| GRINDSTONE                        | 0.132 | 0.150 | 0.099 | 0.064  | 0.003  | 0.008  | 0.090   | 0.000  | 0.001  | 0.001  |
| CHEDOKE                           | 1.705 | 1.873 | 0.483 | 1.440  | 0.125  | 0.190  | 1.444   | 0.255  | 0.031  | 0.044  |
| REDHILL                           | 4.657 | 6.250 | 1.918 | 4.065  | 0.303  | 0.710  | 3.416   | 0.404  | 0.027  | 0.019  |
| STN 9031 AUG 12 2003              | 1.137 | 1.128 | 0.354 | 1.095  | 0.073  | 0.166  | 1.003   | 0.110  | 0.026  | 0.022  |
| STN 9031 DEC 02 2004              | 1.139 | 1.151 | 0.483 | 1.102  | 0.076  | 0.174  | 1.039   | 0.112  | 0.033  | 0.030  |
| STN 9032 MAY 20 2003              | 1.189 | 1.306 | 0.481 | 1.081  | 0.086  | 0.146  | 1.104   | 0.106  | 0.050  | 0.035  |
| STN 52 NOV 27 2003                | 2.254 | 2.454 | 0.812 | 2.197  | 0.156  | 0.315  | 2.034   | 0.205  | 0.077  | 0.064  |
| STN 9032 JUN 16 2004              | 1.224 | 1.245 | 0.427 | 1.164  | 0.068  | 0.195  | 1.133   | 0.135  | 0.045  | 0.029  |
| STN 9081 MAY 17 2005              | 1.225 | 1.599 | 0.520 | 1.047  | 0.093  | 0.190  | 1.046   | 0.116  | 0.051  | 0.025  |
| STN 9081 JUN 21 2005              | 1.718 | 2.318 | 0.684 | 1.814  | 0.178  | 0.337  | 1.740   | 0.236  | 0.085  | 0.037  |
| STN 9081 SEPT 07 05               | 1.935 | 2.787 | 0.749 | 2.050  | 0.195  | 0.426  | 1.759   | 0.307  | 0.083  | 0.036  |
| STN 9081 AUG 12 2006              | 1.350 | 1.897 | 0.545 | 0.139  | 0.146  | 0.280  | 1.268   | 0.137  | 0.053  | 0.026  |
| STN 9083 MAY 17 2005              | 2.036 | 2.552 | 0.944 | 2.418  | 0.185  | 0.403  | 2.048   | 0.292  | 0.102  | 0.038  |
| STN 9083 JUN 21 2005              | 2.635 | 3.763 | 1.171 | 2.734  | 0.236  | 0.611  | 2.766   | 0.370  | 0.130  | 0.048  |
| STN 9083 AUG 12 2006              | 2.299 | 3.188 | 0.899 | 2.456  | 0.251  | 0.502  | 1.903   | 0.267  | 0.106  | 0.047  |
| STN 9030 NOV 07 2002              | 2.488 | 2.569 | 0.880 | 1.868  | 0.370  | 0.370  | 2.045   | 0.252  | 0.074  | 0.045  |
| STN 9030 JUL 29 2004              | 0.544 | 0.544 | 0.224 | 0.553  | 0.044  | 0.079  | 0.532   | 0.060  | 0.021  | 0.013  |
| STN 53 NOV 27 2003                | 2.632 | 2.538 | 0.923 | 2.462  | 0.217  | 0.389  | 2.186   | 0.279  | 0.114  | 0.088  |
| STN 9033 AUG 12 2003              | 2.815 | 2.941 | 1.012 | 2.625  | 0.257  | 0.419  | 2.392   | 0.313  | 0.116  | 0.099  |
| STN 9033 DEC 02 2004              | 2.825 | 2.772 | 1.019 | 2.647  | 0.202  | 0.416  | 2.384   | 0.309  | 0.109  | 0.081  |
| WINDERMERE MAY 13 2003            | 6.040 | 6.981 | 2.538 | 5.365  | 0.487  | 0.786  | 5.109   | 0.548  | 0.054  | 0.039  |
| WINDERMERE FEB 19 2004            | 6.681 | 7.369 | 2.916 | 5.939  | 0.584  | 0.865  | 5.165   | 0.605  | 0.049  | 0.035  |
| MEAN CONC                         | 1.974 | 2.306 | 0.789 | 1.792  | 0.168  | 0.310  | 1.700   | 0.210  | 0.056  | 0.035  |
|                                   |       |       |       |        |        |        |         |        |        |        |
| Equation Based Uncertainty Matrix |       |       |       |        |        |        |         |        |        |        |
|                                   | BeP   | BaP   | Per   | lcdPyr | DBahA  | Picene | BghiPer | Cor    | DBT    | 4MeDBT |
| MDL (e <sub>j</sub> )             | 0.147 | 0.147 | 0.147 | 0.0966 | 0.0966 | 0.0966 | 0.0966  | 0.0966 | 0.0196 | 0.0196 |
| d <sub>j</sub> (%)                | 2.2   | 2.2   | 2.2   | 1      | 1      | 1      | 1       | 1      | 21.5   | 21.5   |

| Concentration Matrix              |        |        |        |        |        |        |                |
|-----------------------------------|--------|--------|--------|--------|--------|--------|----------------|
|                                   | 2MeDBT | 3MeDBT | BN21T  | BN23T  |        | SumPAH | SumPAH Deviate |
| SPENCER                           | 0.000  | 0.000  | 0.026  | 0.001  |        | 2.433  | -1.152         |
| INDIAN                            | 0.001  | 0.001  | 0.016  | 0.002  |        | 1.838  | -1.184         |
| BORER'S                           | 0.000  | 0.000  | 0.004  | 0.000  |        | 0.694  | -1.244         |
| DESJARDIN                         | 0.001  | 0.001  | 0.025  | 0.002  |        | 2.908  | -1.127         |
| GRINDSTONE                        | 0.000  | 0.000  | 0.006  | 0.001  |        | 1.623  | -1.195         |
| CHEDOKE                           | 0.008  | 0.023  | 0.208  | 0.029  |        | 20.594 | -0.193         |
| REDHILL                           | 0.008  | 0.010  | 0.318  | 0.076  |        | 48.524 | 1.281          |
| STN 9031 AUG 12 2003              | 0.007  | 0.010  | 0.085  | 0.012  |        | 13.095 | -0.589         |
| STN 9031 DEC 02 2004              | 0.009  | 0.015  | 0.089  | 0.017  |        | 13.937 | -0.545         |
| STN 9032 MAY 20 2003              | 0.013  | 0.016  | 0.098  | 0.016  |        | 14.968 | -0.490         |
| STN 52 NOV 27 2003                | 0.022  | 0.031  | 0.169  | 0.039  |        | 25.924 | 0.088          |
| STN 9032 JUN 16 2004              | 0.012  | 0.015  | 0.096  | 0.019  |        | 13.942 | -0.545         |
| STN 9081 MAY 17 2005              | 0.010  | 0.015  | 0.077  | 0.015  |        | 15.073 | -0.485         |
| STN 9081 JUN 21 2005              | 0.017  | 0.020  | 0.154  | 0.035  |        | 26.911 | 0.140          |
| STN 9081 SEPT 07 05               | 0.016  | 0.020  | 0.166  | 0.048  |        | 26.765 | 0.132          |
| STN 9081 AUG 12 2006              | 0.013  | 0.015  | 0.113  | 0.023  |        | 17.594 | -0.352         |
| STN 9083 MAY 17 2005              | 0.015  | 0.018  | 0.193  | 0.033  |        | 36.886 | 0.667          |
| STN 9083 JUN 21 2005              | 0.021  | 0.028  | 0.270  | 0.066  |        | 44.159 | 1.051          |
| STN 9083 AUG 12 2006              | 0.020  | 0.026  | 0.163  | 0.032  |        | 31.068 | 0.359          |
| STN 9030 NOV 07 2002              | 0.015  | 0.019  | 0.181  | 0.034  |        | 27.018 | 0.146          |
| STN 9030 JUL 29 2004              | 0.006  | 0.007  | 0.049  | 0.009  |        | 6.736  | -0.925         |
| STN 53 NOV 27 2003                | 0.037  | 0.048  | 0.271  | 0.050  |        | 30.404 | 0.324          |
| STN 9033 AUG 12 2003              | 0.039  | 0.052  | 0.215  | 0.047  |        | 32.541 | 0.437          |
| STN 9033 DEC 02 2004              | 0.036  | 0.048  | 0.226  | 0.046  |        | 30.765 | 0.343          |
| WINDERMERE MAY 13 2003            | 0.014  | 0.018  | 0.481  | 0.116  |        | 71.192 | 2.478          |
| WINDERMERE FEB 19 2004            | 0.013  | 0.017  | 0.479  | 0.126  |        | 73.130 | 2.580          |
| MEAN CONC                         | 0.014  | 0.018  | 0.161  | 0.034  | MEAN   | 24.259 |                |
|                                   |        |        |        |        | STDEVP | 18.943 |                |
| Equation Based Uncertainty Matrix |        |        |        |        |        |        |                |
|                                   | 2MeDBT | 3MeDBT | BN21T  | BN23T  |        |        |                |
| MDL (e_j)                         | 0.0196 | 0.0196 | 0.0246 | 0.0246 |        |        |                |
| d_j (%)                           | 21.5   | 21.5   | 2.2    | 2.2    |        |        |                |

Table S5: PMF diagnostics file for Hamilton Harbour suspended sediments

| ANALYSIS START                                                                                                               |           |                                         |           |         |                                                   |  |  |  |  |
|------------------------------------------------------------------------------------------------------------------------------|-----------|-----------------------------------------|-----------|---------|---------------------------------------------------|--|--|--|--|
| Time of run (approx.): 12-Apr-2008 17:15:50                                                                                  |           |                                         |           |         |                                                   |  |  |  |  |
| Concentrations File: C:\Documents and Settings\Yemi\My Documents\YEMIResData\HH SPREADSHEETS\HH PAC SPREADSHEETS\HH_conc.csv |           |                                         |           |         |                                                   |  |  |  |  |
| Uncertainty File: C:\Documents and Settings\Yemi\My Documents\YEMIResData\HH SPREADSHEETS\HH PAC SPREADSHEETS\HH_un_eqn.csv  |           |                                         |           |         |                                                   |  |  |  |  |
| Number of random starting points: 15                                                                                         |           |                                         |           |         |                                                   |  |  |  |  |
| Number of factors: 4                                                                                                         |           |                                         |           |         |                                                   |  |  |  |  |
| Seed: Used random seed.                                                                                                      |           |                                         |           |         |                                                   |  |  |  |  |
| c3 Modeling Constant(Percent): 0.00                                                                                          |           |                                         |           |         |                                                   |  |  |  |  |
| Species included:                                                                                                            |           |                                         |           |         |                                                   |  |  |  |  |
| Strong - Phen,Anth,Fluoranth,Pyrene,                                                                                         |           |                                         |           |         | Weak (down-weighted) - BghiFlu,CcdPyr,BaP,lcdPyr, |  |  |  |  |
| BaA,Chrys/triph,BbF,BkF,                                                                                                     |           |                                         |           |         | DBahA,4MeDBT,2MeDBT,3MeDBT,                       |  |  |  |  |
| BjF,BeP,Per,Picene,                                                                                                          |           |                                         |           |         | BN23T,                                            |  |  |  |  |
| BghiPer,Cor,DBT,BN21T,                                                                                                       |           |                                         |           |         |                                                   |  |  |  |  |
| Species not included                                                                                                         |           | Bad (not included) - No "Bad" variables |           |         |                                                   |  |  |  |  |
| ~~~~~                                                                                                                        |           |                                         |           |         |                                                   |  |  |  |  |
| Q Values for random-start runs                                                                                               |           |                                         |           |         |                                                   |  |  |  |  |
| ~~~~~                                                                                                                        |           |                                         |           |         |                                                   |  |  |  |  |
| Random R                                                                                                                     | Q(Robust) | Q(True)                                 | Converged | # Steps |                                                   |  |  |  |  |
| 1                                                                                                                            | 215.62    | 216.75                                  | Yes       | 551     |                                                   |  |  |  |  |
| 2                                                                                                                            | 215.63    | 216.75                                  | Yes       | 794     |                                                   |  |  |  |  |
| 3                                                                                                                            | 215.62    | 216.74                                  | Yes       | 622     |                                                   |  |  |  |  |
| 4                                                                                                                            | 215.63    | 216.76                                  | Yes       | 747     |                                                   |  |  |  |  |
| 5                                                                                                                            | 215.62    | 216.74                                  | Yes       | 637     |                                                   |  |  |  |  |
| 6                                                                                                                            | 215.62    | 216.75                                  | Yes       | 365     |                                                   |  |  |  |  |
| 7                                                                                                                            | 215.65    | 216.78                                  | Yes       | 540     |                                                   |  |  |  |  |
| 8                                                                                                                            | 215.66    | 216.79                                  | Yes       | 581     |                                                   |  |  |  |  |
| 9                                                                                                                            | 215.62    | 216.75                                  | Yes       | 500     |                                                   |  |  |  |  |
| 10                                                                                                                           | 215.65    | 216.78                                  | Yes       | 964     |                                                   |  |  |  |  |
| 11                                                                                                                           | 215.63    | 216.75                                  | Yes       | 662     |                                                   |  |  |  |  |
| 12                                                                                                                           | 215.62    | 216.75                                  | Yes       | 639     |                                                   |  |  |  |  |
| 13                                                                                                                           | 215.63    | 216.76                                  | Yes       | 484     |                                                   |  |  |  |  |
| 14                                                                                                                           | 215.63    | 216.75                                  | Yes       | 468     |                                                   |  |  |  |  |
| 15                                                                                                                           | 215.62    | 216.75                                  | Yes       | 580     |                                                   |  |  |  |  |
|                                                                                                                              |           |                                         |           |         |                                                   |  |  |  |  |
|                                                                                                                              |           |                                         |           |         |                                                   |  |  |  |  |

| START BASE FACTOR ANALYSIS of Random Run # 3 |           |       |      |                |             |
|----------------------------------------------|-----------|-------|------|----------------|-------------|
| Regression diagnostics of run# 3             |           |       |      |                |             |
| Species                                      | Intercept | Slope | RMSE | r <sup>2</sup> | S/N         |
| Phen                                         | -0.06     | 1.05  | 0.2  | 0.95           | 2.32        |
| Anth                                         | 0.03      | 0.79  | 0.03 | 0.95           | 2.15        |
| Fluoranth                                    | 0.39      | 0.79  | 0.52 | 0.92           | 2.32        |
| Pyrene                                       | 0.55      | 0.56  | 0.58 | 0.84           | 2.32        |
| BghiFlu                                      | 0.01      | 0.94  | 0.05 | 0.95           | 5.19        |
| BaA                                          | 0.01      | 1     | 0.02 | 1              | 16.25       |
| <b>CcdPyr</b>                                | 0.02      | 0.47  | 0.02 | <b>0.4</b>     | <b>0.62</b> |
| Chrys/Tripl                                  | 0         | 1     | 0.03 | 1              | 17.61       |
| BbF                                          | 0.04      | 0.99  | 0.16 | 1              | 11.04       |
| BkF                                          | -0.02     | 1     | 0.17 | 0.99           | 5.49        |
| BjF                                          | 0.03      | 0.99  | 0.1  | 0.99           | 5.15        |
| BeP                                          | -0.02     | 1.01  | 0.06 | 1              | 7.16        |
| BaP                                          | 0         | 0.99  | 0.28 | 0.98           | 8.58        |
| Per                                          | 0         | 1     | 0.07 | 0.99           | 3.06        |
| IcdPyr                                       | 0.14      | 0.94  | 0.28 | 0.97           | <b>9.88</b> |
| DBahA                                        | 0.01      | 0.96  | 0.03 | 0.95           | <b>0.76</b> |
| Picene                                       | 0         | 0.99  | 0.03 | 0.98           | 1.53        |
| BghiPer                                      | 0         | 1     | 0.07 | 1              | 9.84        |
| Cor                                          | 0.01      | 0.96  | 0.03 | 0.98           | 1.05        |
| DBT                                          | 0         | 0.95  | 0.01 | 0.95           | 1.19        |
| 4MeDBT                                       | 0         | 0.88  | 0.01 | 0.88           | <b>0.78</b> |
| 2MeDBT                                       | 0         | 0.87  | 0    | 0.86           | <b>0.24</b> |
| 3MeDBT                                       | 0         | 0.89  | 0.01 | 0.85           | <b>0.34</b> |
| BN21T                                        | 0.01      | 0.97  | 0.02 | 0.98           | 3.53        |
| BN23T                                        | 0         | 0.94  | 0    | 0.98           | <b>0.62</b> |
| *****                                        |           |       |      |                |             |

|                                                        |                                |  |  |  |  |  |  |
|--------------------------------------------------------|--------------------------------|--|--|--|--|--|--|
| Observations (residuals) beyond 3 Std. Dev.            |                                |  |  |  |  |  |  |
|                                                        |                                |  |  |  |  |  |  |
| Species                                                | Obs. (residuals)               |  |  |  |  |  |  |
| IcdPyrene                                              | 16( -4.3 )                     |  |  |  |  |  |  |
|                                                        |                                |  |  |  |  |  |  |
| *****                                                  |                                |  |  |  |  |  |  |
| Species                                                | (residuals) beyond 3 Std. Dev. |  |  |  |  |  |  |
|                                                        |                                |  |  |  |  |  |  |
| Obs.                                                   | Species (residuals)            |  |  |  |  |  |  |
| 16                                                     | IcdPyrene ( -4.3 )             |  |  |  |  |  |  |
|                                                        |                                |  |  |  |  |  |  |
| _____ END BASE FACTOR ANALYSIS of Random Run # 3 _____ |                                |  |  |  |  |  |  |
|                                                        |                                |  |  |  |  |  |  |
|                                                        |                                |  |  |  |  |  |  |
|                                                        |                                |  |  |  |  |  |  |
|                                                        |                                |  |  |  |  |  |  |

Figure S8: PCA-MLR source contributions plot for Hamilton Harbour suspended sediments and creek sediments ( $\mu\text{g/g}$ ).

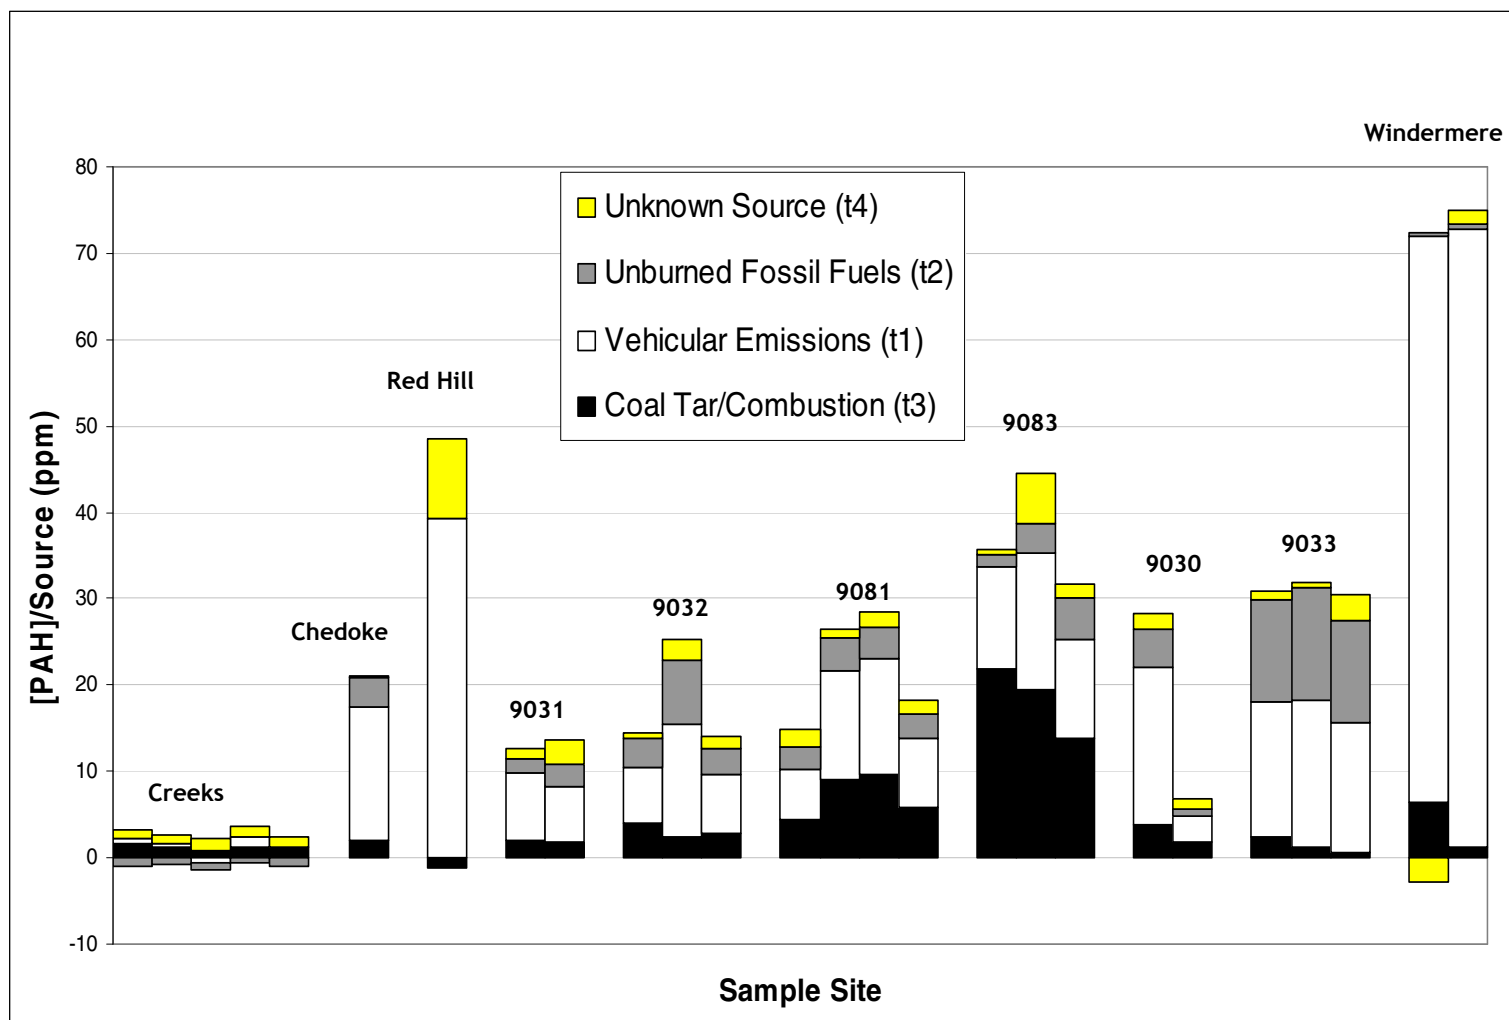



Figure S9: Contributions of four PMF factors (in  $\mu\text{g/g}$ ) to the SumPAH ( $\mu\text{g/g}$ ) of each suspended sediment sample collected in Hamilton Harbour and the creeks.

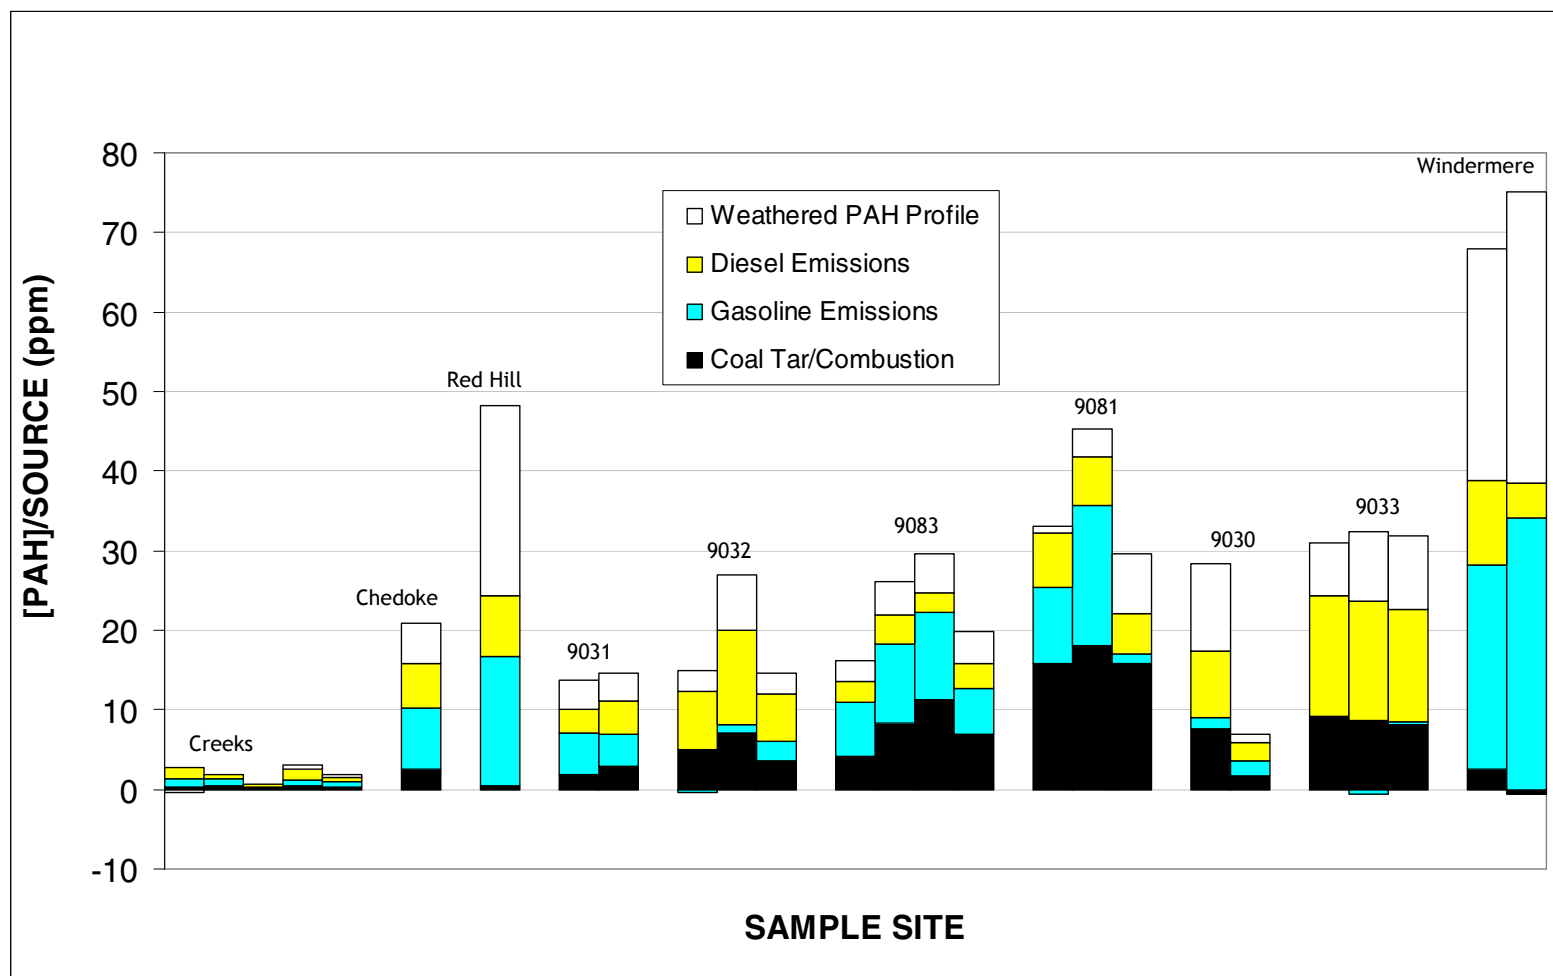

## Principal Component Analysis of Hamilton Harbour Data

The PCA model in this context was run thus:

For a data matrix  $X_{n \times m}$

where  $n$  = number of rows indicating observations/samples

$m$  = number of columns indicating species/elements

First standardize the  $x_{ij}$  matrix elements such that a new  $z$  matrix is produced in which

$$z_{ij} = (x_{ij} - \bar{x}_j) / \sigma_j \quad (1)$$

where  $z_{ij}$  is the standard deviate of element  $x_{ij}$

$x_{ij}$  is the concentration value of the  $j$ th element in the  $i$ th sample

$\bar{x}_j$  is the mean concentration of the  $j$ th element over all observations

$\sigma_j$  is the standard deviation of the concentrations of the  $j$ th element

The PCA is run such that

$$z_{ij} = \sum_{k=1}^p P_{ik} \cdot W_{kj} \quad (2)$$

where;  $k = 1, \dots, p$  the pollutional source components

$i = 1, \dots, n$  the number of observations/samples

$j = 1, \dots, m$  the number of species/elements

$W_{kj}$  is the coefficient matrix of the components (transpose of loadings matrix)

$P_{ik}$  is the  $k$ th component's value for observation/sample  $i$  (scores)

Thurston and Spengler report that inversion of equation (2) yields

$$P_{ik} = \sum_{j=1}^m z_{ij} \cdot \frac{W_{jk}}{\lambda_k} \quad (3)$$

$\lambda_k$  is an eigenvalue associated with the principal component  $P_k$  and it is derived from eigenvalue analysis of  $R_{jxj}$  the correlation matrix, i.e., find an eigenvector matrix  $U_{jxj}$  such that  $R_{jxj}$  is diagonalized

$$U_{jxj}^{-1} R_{jxj} U_{jxj} = \Lambda_{jxj} \quad (4)$$

since PCA assumes that components are not correlated, the eigenvector matrix must satisfy the square orthonormal rule i.e.,

$$U_{jxj}^{-1} U_{jxj} = U_{jxj} U_{jxj}^{-1} = I \quad (5)$$

for orthogonality of the components

The diagonal elements of  $\Lambda_{jxj}$  are the eigenvalues which are ordered in descending magnitude since each preceding eigenvector is chosen such that its eigenvalue from the diagonalization of the correlation matrix explains more variance in the data set than the succeeding one.

The elements in each column of the  $U_{j \times j}$  matrix (i.e., eigenvectors) by definition are equal to  $\frac{W_{jk}}{\lambda_k}$

Substituting the eigenvectors into equation (3) gives  $P_{ik}$  (scores)

A key feature of PCA is data dimension reduction. This is possible because the eigenvalues are ordered in descending magnitude, thus the number of pollutional components  $p$  is usually less than the number of species  $m$ , i.e.,  $p < m$

Multilinear regression MLR was done such that the scores  $P_{ik}$  were regressed against the standard deviate elements of SumPAH column vector i.e.,

$$Z_{i_y} = \sum_{k=1}^p B_k P_{ik}$$

where  $B_k$  are the MLR coefficients for each column  $k$  of  $P_{ik}$  over all  $i$ .

More details on the PCA model can be found in:

1. Hopke P. K.; Receptor Modeling in Environmental Chemistry. Wiley-Interscience: NY, **1985**
2. Thurston G. D., Spengler J. D.; A quantitative assessment of source contributions to inhalable particulate matter pollution in metropolitan Boston. *Atmospheric Environment*, Vol 19, No. 1, pp 9-25, **1985**
